# Supplementary material
Source: PubMed Central journal article supplement (PMC3421742)
Supplement: JVI.00280-12_zjv999096331so1.pdf [file JVI.00280-12_zjv999096331so1.pdf]

1 Supplementary Figure Legends

2 Supplementary Figure 1. ERV-DC, RD-114 and endogenous FeLV are not detected in  
3 *Prionailurus bengalensis euptilura* (Tsushima leopard cat). Chromosomal DNA isolated  
4 from PBMC from *Felis silvestris catus* (*F. s. catus*) and muscle from *Prionailurus*  
5 *bengalensis euptilura* (*P. b. euptilura*), respectively, were used for detection of ERV-DC,  
6 RD114 and endogenous FeLV (enFeLV) by PCR with GoTaq polymerase (Promega)  
7 and specific primers indicated in Supplementary Table 4. DNA samples #3 and #5 from  
8 *P. b. euptilura* were also used for Southern blot analysis as shown in Fig. 2A.

9

10 Supplementary Figure 2. Infection of cell lines with ERV-DC10 and ERV-DC18.  
11 Several cell lines were infected with culture supernatant (300  $\mu$ l) from HEK293T cells  
12 persistently infected with ERV-DC10 or ERV-DC18. After infection, cells were  
13 cultured for 2 to 7 days then lysed and cellular DNA was used for PCR with Fe-13S and  
14 Fe-18R to detect the ERV-DC *env* gene. M; Mock infection.

15

16 Supplementary Figure 3. Structures and sequences of the genomes of full length  
17 FeLV-D/ON-T and partial FeLV-D strains. (A) Alignment of ERV-DC Env with  
18 FeLV-D Env. (B) FeLV-D proviruses contain LTR sequences from exogenous FeLV  
19 prototype. FeLV-D/ON-C A2 and B4 clones were obtained from the same cat and  
20 FeLV-D/ON-C B4 clone has an enhancer duplication in the LTR. (C) The *gag*, *pol*, and  
21 *env* genes are illustrated with the 5' and/or 3' LTRs and positions of the *gag* and  
22 *env* translational initiation codons (ATG). Asterisks indicate conserved stop codons.

23 Open boxes indicate open reading frames. Open triangle indicates a deletion of  
24 nucleotides and filled triangle indicates an insertion of nucleotides. (D) Putative map of  
25 FeLV-D *env* recombination junction in comparison with FeLV-A/61E.

26

27 Supplementary Figure 4. Expression of FeLV-D in the spleen of cat ON-T. FeLV-D  
28 *env* (A) gene transcript and (B) spliced *env* gene transcript were detected by RT-PCR  
29 with the Fe-14S and Fe-1R primer pair and Fe-97S and Fe-21R primer pair, respectively,  
30 in the spleen from the cat with FeLV-D/ON-T. High molecular weight bands are  
31 presumably unspliced FeLV-D mRNA. SD (splice donor site) and SA (splice acceptor  
32 site) were determined by sequencing viral fragments. 1: spleen from the cat (ON-T); 2:  
33 3201 cells (FeLV negative feline lymphoma); 3: FT-1 cells (FeLV positive feline  
34 lymphoma); 4: FL74 cells (FeLV positive feline lymphoma).

35 Supplementary Figure 5. Alignment of Env from FeLV-A, FeLV-B, FeLV-D and  
36 ERV-DC.

37

# Supplementary Figure 1

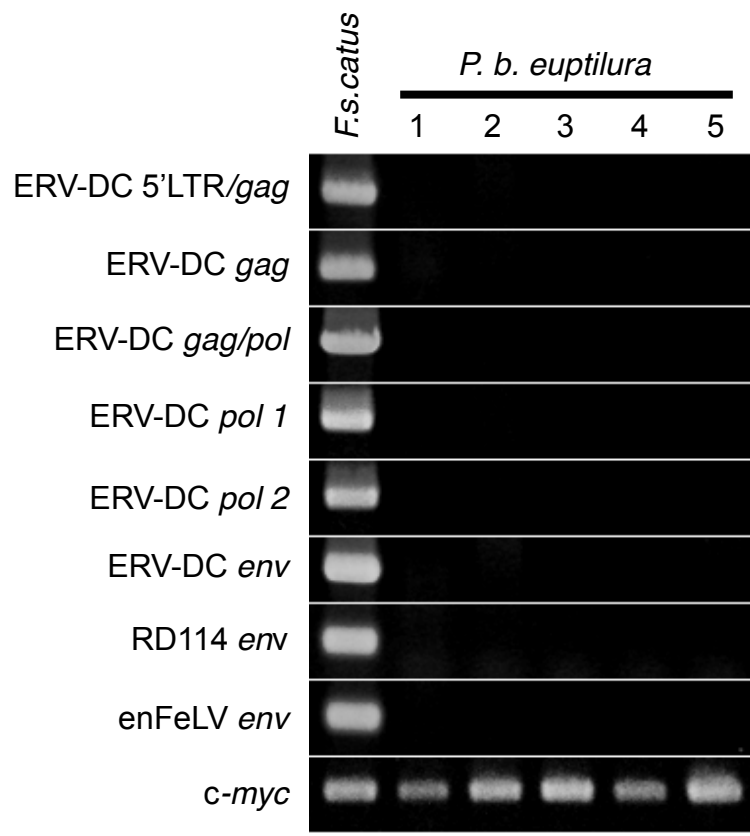

# Supplementary Figure 2

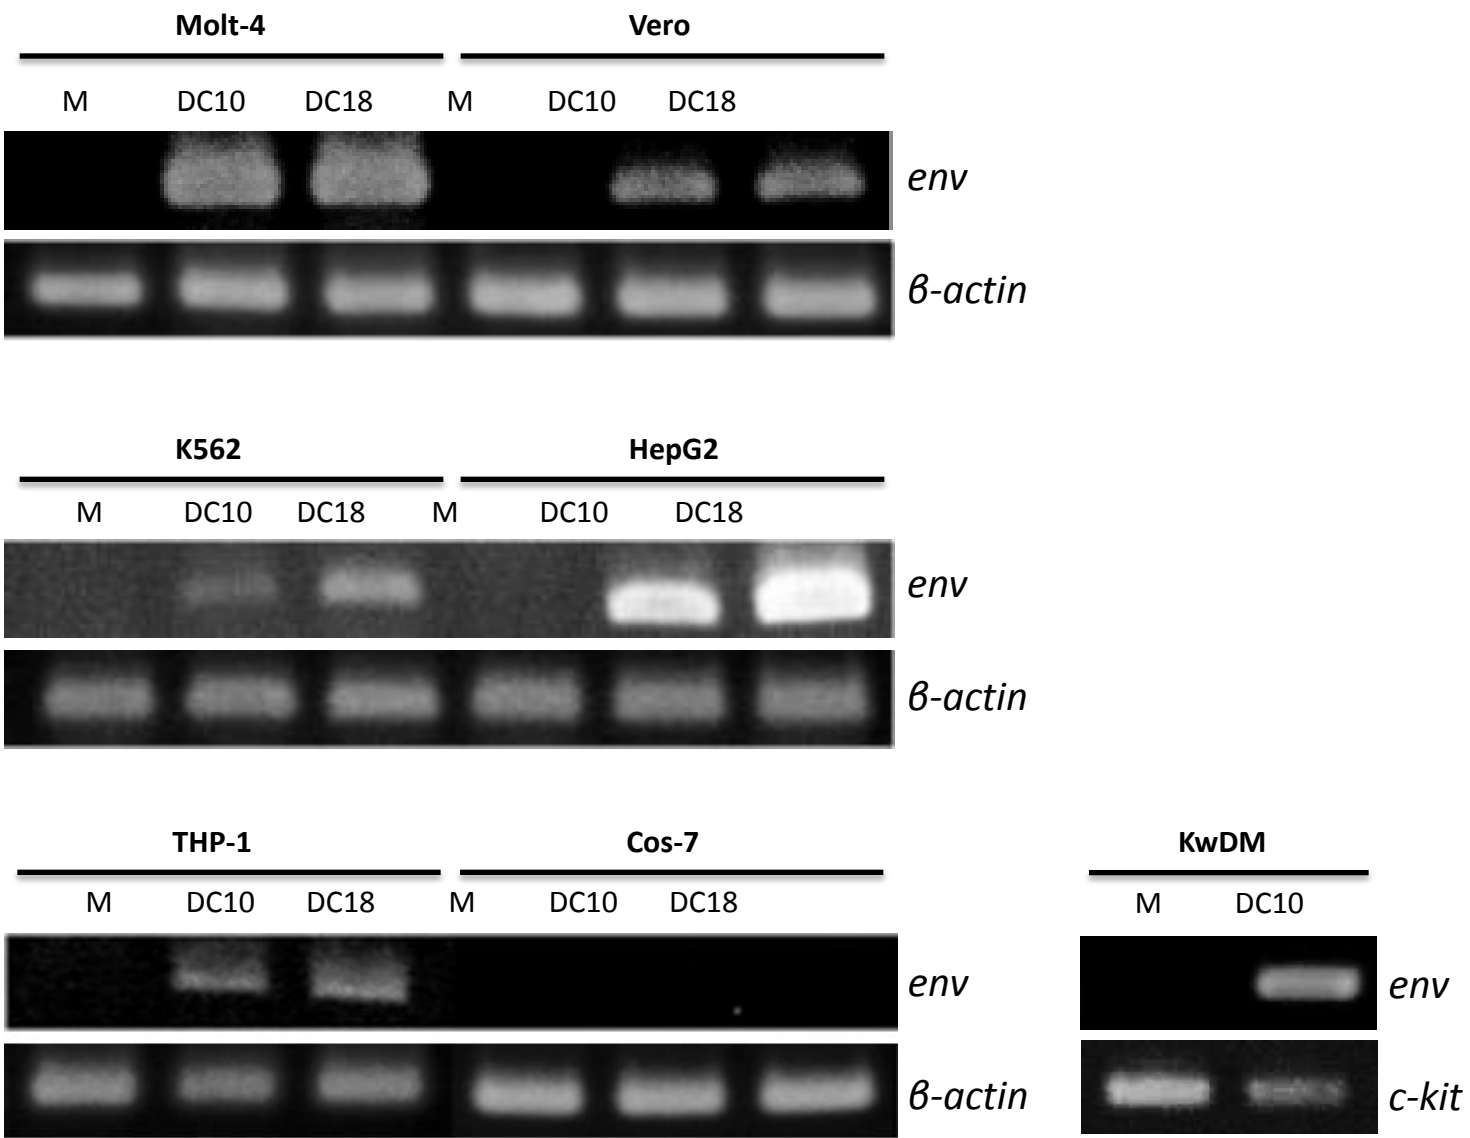

# Supplementary Figure 3

**A**

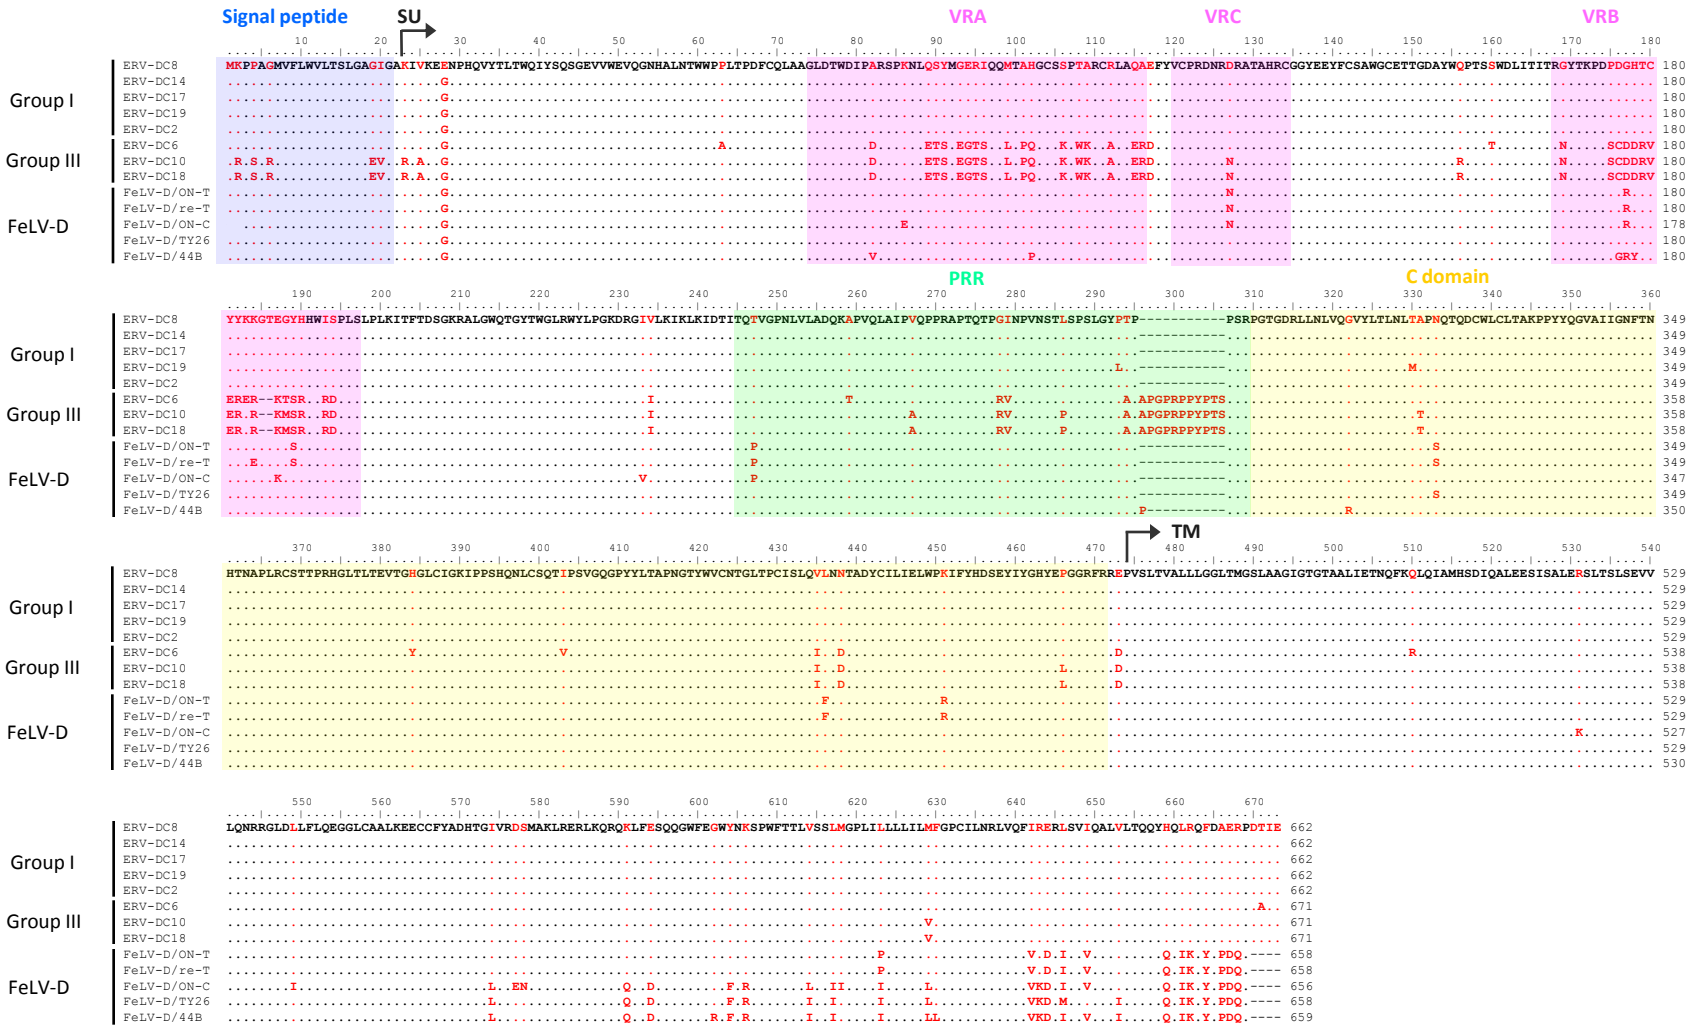



# Supplementary Figure 3

**C**

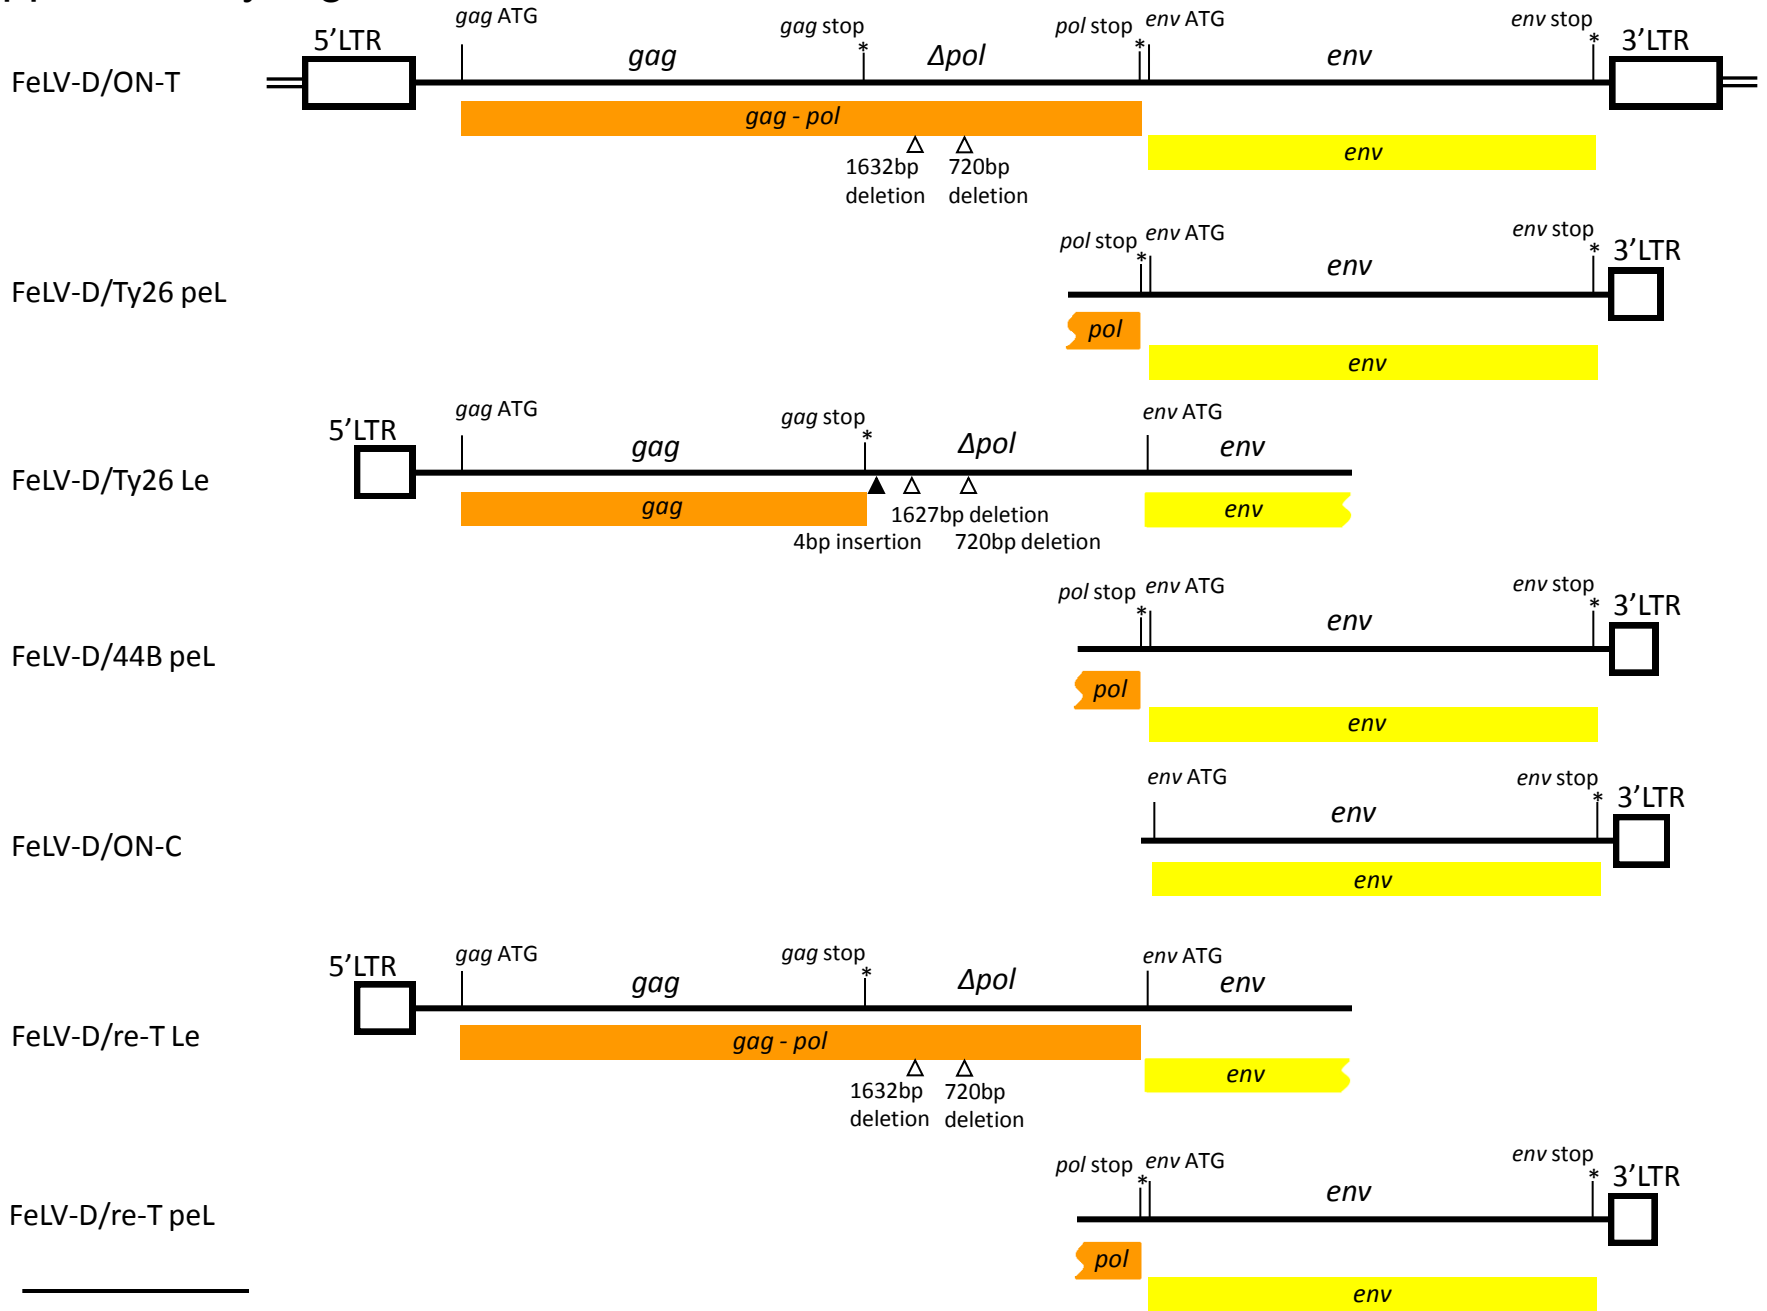





# Supplementary Figure 4

**A**

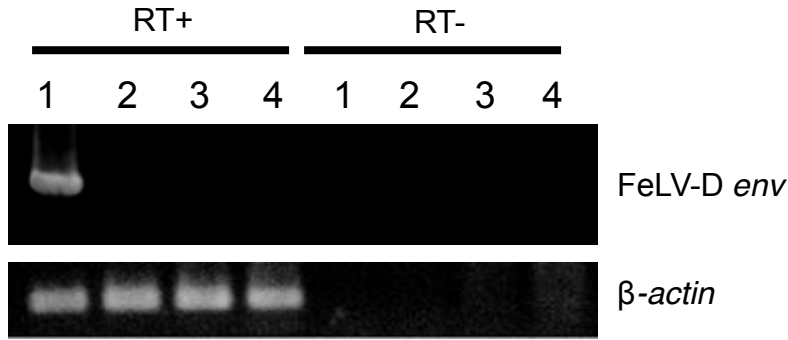

**B**

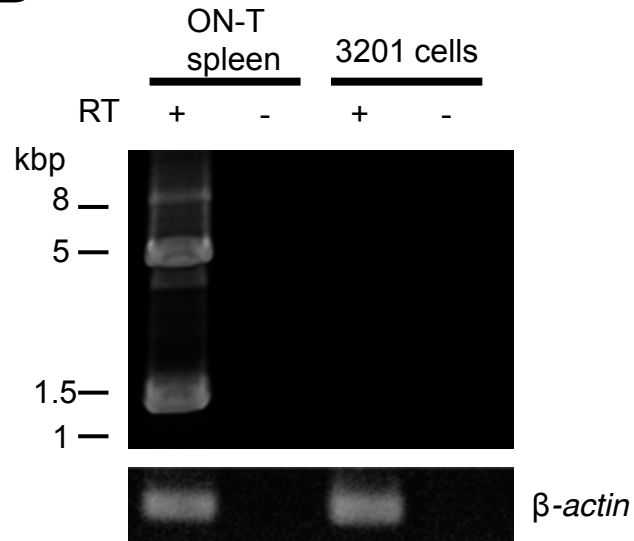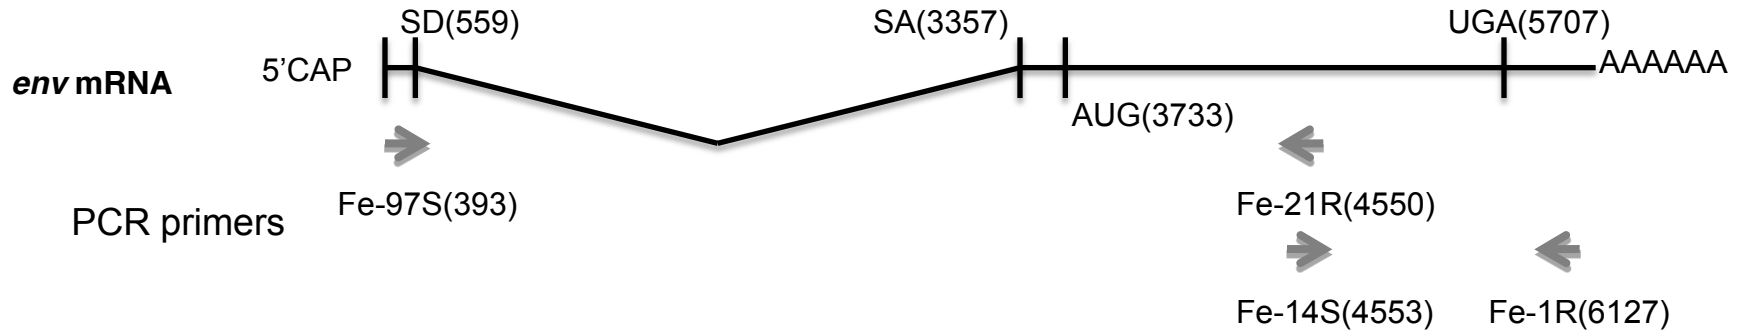

# Supplementary Figure 5

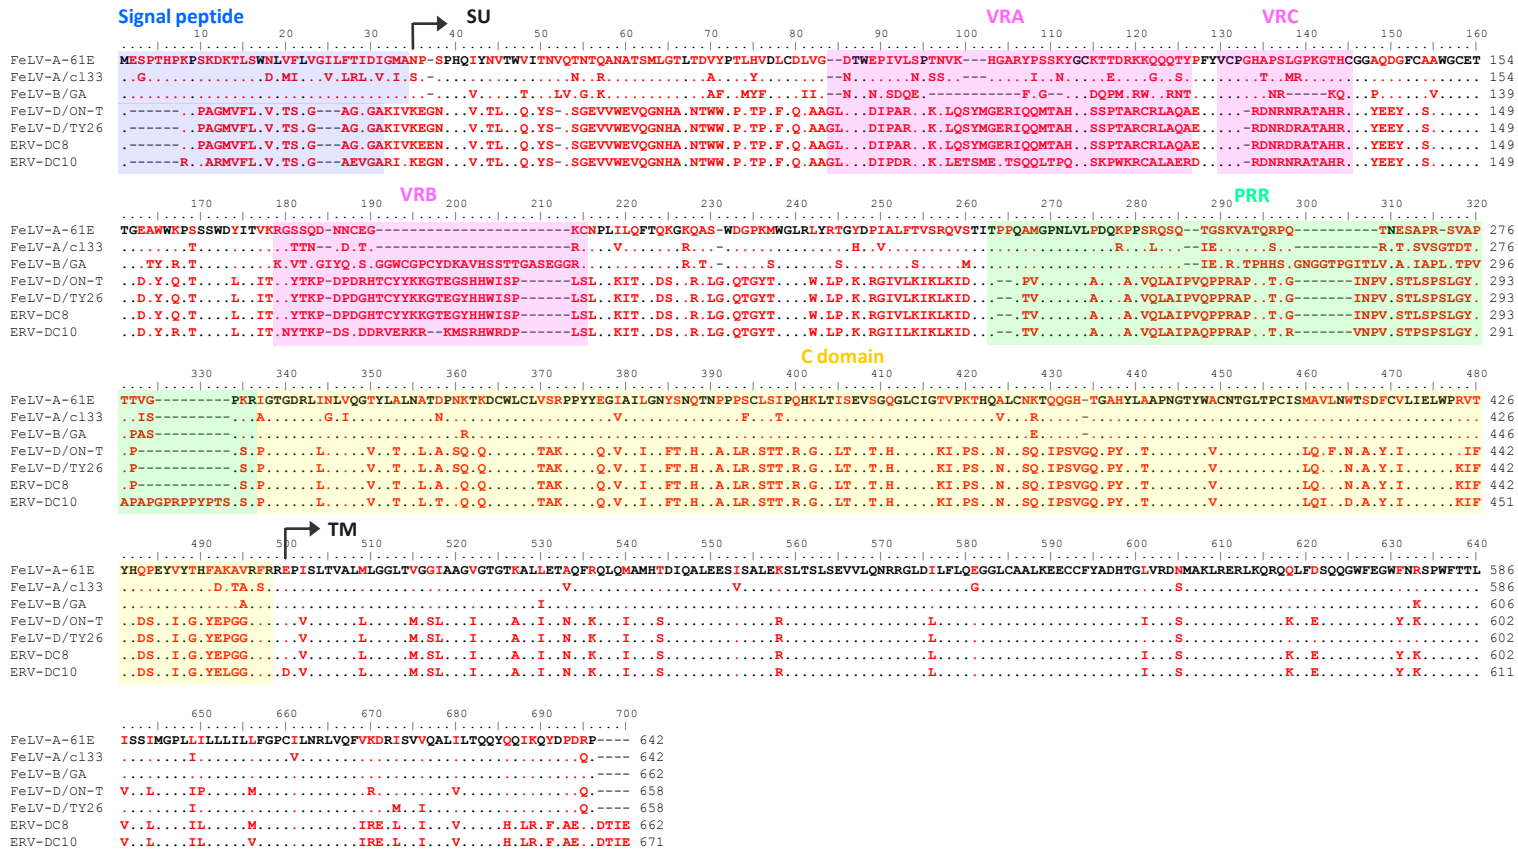

# Supplementary Table 1-1

## Insertional polymorphisms of ERV-DC proviruses

| Provirus  | -/- (%)     | +/- (%)     | +/+ (%)    | Total (%) |
|-----------|-------------|-------------|------------|-----------|
| ERV-DC1   | 182 (74.6)  | 55 (22.5)   | 7 (2.9)    | 244 (100) |
| ERV-DC2   | 57 (23.36)  | 118 (48.36) | 69 (28.28) | 244 (100) |
| ERV-DC3   | 156 (63.9)  | 77 (31.6)   | 11 (4.5)   | 244 (100) |
| ERV-DC4   | 51 (20.9)   | 107 (43.9)  | 86 (35.2)  | 244 (100) |
| ERV-DC6*  | 3 (1.2)     | -           | 241 (98.8) | 244 (100) |
| ERV-DC7   | 0 (0)       | 0 (0)       | 244 (100)  | 244 (100) |
| ERV-DC8   | 76 (31.2)   | 113 (46.3)  | 55 (22.5)  | 244 (100) |
| ERV-DC10  | 152 (62.3)  | 72 (29.5)   | 20 (8.2)   | 244 (100) |
| ERV-DC14  | 238 (97.5)  | 6 (2.5)     | 0 (0)      | 244 (100) |
| ERV-DC16* | 0 (0)       | -           | 244 (100)  | 244 (100) |
| ERV-DC17  | 205 (84.02) | 35 (14.34)  | 4 (1.64)   | 244 (100) |
| ERV-DC18  | 243 (99.6)  | 1 (0.4)     | 0 (0)      | 244 (100) |
| ERV-DC19  | 171 (70.1)  | 37 (15.2)   | 36 (14.7)  | 244 (100) |

\* Pre-integration site was not identified.

# Supplementary Table 1-2

Insertional polymorphisms of ERV-DC proviruses in siblings from one family

| Locus    | sibling |      |      |      |
|----------|---------|------|------|------|
|          | ON-T    | ON-L | ON-C | ON-H |
| ERV-DC1  | -/-     | +/-  | +/-  | +/-  |
| ERV-DC2  | -/-     | +/+  | +/-  | +/-  |
| ERV-DC3  | -/-     | -/-  | +/-  | -/-  |
| ERV-DC4  | -/-     | +/+  | +/+  | +/-  |
| ERV-DC6  | +       | +    | +    | +    |
| ERV-DC7  | +/+     | +/+  | +/+  | +/+  |
| ERV-DC8  | -/-     | -/-  | -/-  | -/-  |
| ERV-DC10 | +/-     | -/-  | +/-  | +/-  |
| ERV-DC14 | -/-     | -/-  | -/-  | -/-  |
| ERV-DC16 | +       | +    | +    | +    |
| ERV-DC17 | +/-     | +/-  | +/-  | +/-  |
| ERV-DC18 | +/-     | -/-  | +/-  | +/-  |
| ERV-DC19 | +/+     | +/+  | +/+  | +/+  |
| virus    | ON-T    | ON-L | ON-C | ON-H |
| FeLV     | +       | -    | +    | +    |
| FeLV-D   | +       | -    | +    | -    |

Supplementary Table 2. ERV elements found in the genomes of 12 species examined by using RetroTector©

| Species    | Nomenclature                    | Gag   | Pro   | Pol   | Env   |
|------------|---------------------------------|-------|-------|-------|-------|
| Human      | <i>Homo sapiens</i>             | 2,672 | 2,121 | 3,757 | 1,439 |
| Chimpanzee | <i>Pan troglodytes</i>          | 1,729 | 1,618 | 2,859 | 1,212 |
| Orangutan  | <i>Pongo abelii</i>             | 1,617 | 1,450 | 2,740 | 1,462 |
| Macaque    | <i>Macaca mulatta</i>           | 1,658 | 1,451 | 2,469 | 1,328 |
| Mouse      | <i>Mus musculus</i>             | 4,733 | 4,823 | 7,926 | 2,483 |
| Rat        | <i>Rattus norvegicus</i>        | 1,971 | 1,917 | 4,037 | 1,565 |
| Cow        | <i>Bos taurus</i>               | 1,336 | 1,489 | 3,248 | 1,539 |
| Horse      | <i>Equus caballus</i>           | 370   | 329   | 916   | 543   |
| Dog        | <i>Canis familiaris</i>         | 595   | 568   | 2,107 | 1,016 |
| Opossum    | <i>Monodelphis domestica</i>    | 3,857 | 5,264 | 8,236 | 359   |
| Platypus   | <i>Ornithorhynchus anatinus</i> | 51    | 162   | 298   | 280   |
| Chicken    | <i>Gallus gallus</i>            | 95    | 196   | 335   | 16    |

Supplementary Table 3. ERVs found in several non-cat species are similar to ERV-DCs

| Species | Chromosome            | Gene locus of Pol <sup>a</sup> | Gene locus of Env <sup>a</sup> |
|---------|-----------------------|--------------------------------|--------------------------------|
| Mouse   | 1                     | -                              | 184,193,575-184,195,425        |
|         | 2                     | 57,072,703-57,069,422          | 57,069,479-57,067,629          |
|         | 4                     | -                              | 101,538,418-101,536,568        |
|         | 4                     | -                              | 107,821,296-107,819,446        |
|         | 4                     | -                              | 146,599,123-146,601,030        |
|         | 5                     | -                              | 145,437,032-14,5438,882        |
|         | 5                     | -                              | 23,208,901-23,207,039          |
|         | 5                     | 44,528,700-44,531,981          | 44,531,924-44,533,774          |
|         | 7                     | 30,403,326-30,406,607          | -                              |
|         | 7                     | -                              | 31,479,983-31,481,833          |
|         | 8                     | -                              | 122,416,121-122,414,271        |
|         | 8                     | -                              | 125,952,270-125,950,330        |
|         | 9                     | -                              | 62,293,167-62,295,017          |
|         | 10                    | 41,159,554-41,162,835          | 41,162,778-41,164,628          |
|         | 11                    | -                              | 6,652,081-6,650,231            |
|         | 11                    | -                              | 88,755,184-88,752,228          |
|         | 11                    | 8,823,400-8,826,681            | 8,826,624-8,828,474            |
|         | 12                    | 55,878,312-55,881,593          | 55,881,536-55,883,386          |
| 13      | -                     | 99,758,886-99,757,036          |                                |
| 15      | -                     | 76,392,903-76,391,053          |                                |
| 16      | 93,703,582-93,700,301 | 93,700,358-93,698,508          |                                |
| 18      | 82,865,942-82,869,223 | 82,869,166-82,871,016          |                                |
| Rat     | 1                     | 12,807,811-12,811,104          | 12,810,909-12,812,831          |
|         | 1                     | 161,820,310-161,817,017        | 161,817,074-161,815,251        |
|         | 1                     | 67,211,080-67,214,373          | -                              |
|         | 2                     | 14,875,612-14,878,905          | 14,878,848-14,880,671          |
|         | 2                     | 188,716,457-188,719,768        | -                              |
|         | 3                     | 126,586,378-126,583,085        | 126,583,280-126,581,358        |
|         | 5                     | 162,275,009-162,271,716        | -                              |
|         | 5                     | -                              | 51,524,508-51,522,586          |
|         | 6                     | 84,256,315-84,253,232          | 84,253,427-84,251,505          |
|         | 8                     | 16,479,431-16,482,724          | -                              |
|         | 8                     | -                              | 43,589,920-43,591,824          |
|         | 11                    | -                              | 23,031,253-23,029,430          |
|         | 11                    | -                              | 40,261,704-40,263,626          |
|         | 12                    | -                              | 27,870,829-27,869,007          |
|         | 14                    | 70,068,348-70,065,055          | 70,065,250-70,063,328          |
|         | 15                    | -                              | 55,097,060-55,098,982          |
|         | 15                    | -                              | 77,703,733-77,705,672          |
|         | 15                    | 92,791,054-92,794,347          | -                              |
|         | X                     | 159,655,885-159,659,178        | 159,658,983-159,660,905        |
|         | Chimpanzee            | 1                              | 24,165,782-24,169,031          |
| Y       |                       | 21,678,398-21,675,140          | -                              |
| Y       |                       | 21,910,354-21,913,613          | -                              |
| Macaque | 1                     | 91,524,508-91,521,256          | -                              |
|         | 5                     | 107,359,987-107,363,239        | -                              |

A dash indicates that an ORF was truncated by substitutions and/or indels. Boldface indicates that the ORF sequence was used as a representative one in Figure 5A and 5B

Supplementary Table 4-1. Primers used for PCR cloning of full-length ERV-DCs

| Provirus locus | Forward | Reverse | Template DNA(cat genome) |
|----------------|---------|---------|--------------------------|
| ERV-DC1        | Fe-60S  | Fe-68R  | IS10                     |
| ERV-DC4        | Fe-56S  | Fe-58R  | IS10                     |
| ERV-DC8        | Fe-57S  | Fe-54R  | IS10                     |
| ERV-DC10       | Fe-90S  | Fe-38R  | GF33                     |
| ERV-DC14       | Fe-58S  | Fe-42R  | SO38                     |
| ERV-DC17       | Fe-75S  | Fe-80R  | ON-T                     |
| ERV-DC18       | Fe-76S  | Fe-81R  | ON-T                     |
| ERV-DC19       | Fe-77S  | Fe-82R  | ON-T                     |

Supplementary Table 4-2. Primers used for PCR cloning of ERV-DC2, DC3, DC-6, DC7 and DC16

| Provirus locus | 5'LTR flanking→env (gag) |               | env→3'LTR flanking |         | Template DNA(cat genome) |
|----------------|--------------------------|---------------|--------------------|---------|--------------------------|
|                | Forward                  | Reverse       | Forward            | Reverse |                          |
| ERV-DC2 *      | Fe-55S                   | Fe-102R (gag) | Fe-19S             | Fe-22R  | IS10                     |
| ERV-DC3        | Fe-61S                   | Fe-78R        | Fe-19S             | Fe-26R  | GF33                     |
| ERV-DC6        |                          |               | Fe-19S             | Fe-30R  | IS10                     |
| ERV-DC7        | Fe-66S                   | Fe-78R        | Fe-19S             | Fe-34R  | IS10                     |
| ERV-DC16       |                          |               | Fe-19S             | Fe-44R  | GF33                     |

\* The fragment PCR-amplified with primers, Fe-55S and Fe-102R was directly sequenced.

Supplementary Table 4-3. Primers used for detection of each ERV-DC pre-integration site

| Pre-integration locus of ERV-DC | Forward | Reverse |
|---------------------------------|---------|---------|
| ERV-DC1                         | Fe-60S  | Fe-68R  |
| ERV-DC2                         | Fe-55S  | Fe-22R  |
| ERV-DC3                         | Fe-61S  | Fe-69R  |
| ERV-DC4                         | Fe-56S  | Fe-58R  |
| ERV-DC7                         | Fe-66S  | Fe-53R  |
| ERV-DC8                         | Fe-57S  | Fe-54R  |
| ERV-DC10                        | Fe-122S | Fe-38R  |
| ERV-DC14                        | Fe-58S  | Fe-56R  |
| ERV-DC17                        | Fe-75S  | Fe-80R  |
| ERV-DC18                        | Fe-76S  | Fe-81R  |
| ERV-DC19                        | Fe-77S  | Fe-82R  |

Supplementary Table 4-4. Primers used for analysis of insertional polymorphisms of ERV-DC

| Provirus locus | Forward | Reverse |
|----------------|---------|---------|
| ERV-DC1        | Fe-36S  | Fe-20R  |
|                | Fe-45S  | Fe-20R  |
| ERV-DC2        | Fe-36S  | Fe-22R  |
|                | Fe-45S  | Fe-22R  |
| ERV-DC3        | Fe-36S  | Fe-26R  |
| ERV-DC4        | Fe-36S  | Fe-27R  |
|                | Fe-45S  | Fe-27R  |
| ERV-DC6        | Fe-36S  | Fe-30R  |
|                | Fe-45S  | Fe-30R  |
| ERV-DC7        | Fe-36S  | Fe-34R  |
|                | Fe-45S  | Fe-34R  |
| ERV-DC8        | Fe-36S  | Fe-35R  |
|                | Fe-45S  | Fe-35R  |
| ERV-DC10       | Fe-36S  | Fe-38R  |
| ERV-DC14       | Fe-36S  | Fe-42R  |
|                | Fe-45S  | Fe-42R  |
| ERV-DC16       | Fe-36S  | Fe-44R  |
| ERV-DC17       | Fe-36S  | Fe-80R  |
|                | Fe-45S  | Fe-80R  |
| ERV-DC18       | Fe-36S  | Fe-81R  |
|                | Fe-46S  | Fe-81R  |
| ERV-DC19       | Fe-36S  | Fe-82R  |
|                | Fe-45S  | Fe-82R  |

Supplementary Table 4-5. Primers used in supplementary Fig. 1

| Gene             | Forward | Reverse |
|------------------|---------|---------|
| ERV-DC 5'LTR/gag | Fe-103S | Fe-102R |
| ERV-DC gag       | Fe-94S  | Fe-102R |
| ERV-DC gag/pol   | Fe-87S  | Fe-71R  |
| ERV-DC pol1      | Fe-73S  | Fe-96R  |
| ERV-DC pol2      | Fe-79S  | Fe-95R  |
| ERV-DC env       | Fe-13S  | Fe-18R  |
| RD114 env        | Fe-15S  | Fe-63R  |
| enFeLV env       | PRB1    | Fe-62R  |
| c-myc            | MY1F    | MY2R    |

Supplementary Table 4-6. Primers used for detection of ERV-DC or FeLV in Fig.3,4 and Supplementary Fig. 2

| Gene           | Forward           | Reverse           |
|----------------|-------------------|-------------------|
| ERV-DC env     | Fe-13S            | Fe-18R            |
| ERV-DC pol     | Fe-73S            | Fe-96R            |
| ERV-DC LTR     | Fe-147S           | Fe-60R            |
| FeLV env       | Fe-2S             | Fe-1R             |
| $\beta$ -actin | Hub-b-actin(DNA)s | Hub-b-actin(DNA)r |
| c-kit          | dog-ckit-1S       | dog-ckit-1R       |



Supplementary Table 4-7. Primers used for FeLV-D screening and cloning in Fig. 6 and Supplementary Fig. 3

| Gene             | Forward | Reverse |
|------------------|---------|---------|
| pol-LTR (peL)    | Fe-9S   | Fe-7R   |
| env-LTR (eL)     | Fe-130S | Fe-7R   |
| LTR-env (Le)     | Fe-37S  | Fe-21R  |
| FeLV-D/ON-T      | Fe-63S  | Fe-73R  |
| FeLV-D screening | Fe-14S  | Fe-3R   |

Supplementary Table 4-8. Primers used for RT-PCR in Supplementary Fig. 4

| Gene                   | Forward | Reverse |
|------------------------|---------|---------|
| 5'LTR-env (for FeLV-D) | Fe-97S  | Fe-21R  |
| env-3'LTR (for FeLV-D) | Fe-14S  | Fe-1R   |

Supplementary Table 4-9. Primers used for expression plasmid construction in Fig. 7

| Expression plasmid   | Template     | Forward | Reverse |
|----------------------|--------------|---------|---------|
| pFU $\Delta$ ssA5    | pFGA5        | Fe-44S  | Fe-50R  |
| pFU $\Delta$ ssGB    | pFGB         | Fe-44S  | Fe-50R  |
| pFU $\Delta$ ssSC    | pFSC         | Fe-44S  | Fe-50R  |
| pFU $\Delta$ ssTY2.0 | pCR4_TY26-1  | Fe-44S  | Fe-50R  |
| pFU $\Delta$ ssON-T  | pON-TpeL     | Fe-130S | Fe-50R  |
| pFU $\Delta$ ssDC10  | ERV-DC/pDC10 | Fe-130S | Fe-126R |

Supplementary Table 4-10. Sequences of primers used in this study

|                   |                                         |
|-------------------|-----------------------------------------|
| Fe-2S             | 5'-CAATACGATCCRGACCRACCATG-3'           |
| Fe-9S             | 5'-GAGACCTCTAGCGCGGCCCTAC-3'            |
| Fe-13S            | 5'-CGGTCCAGCTAGCCATCCCAGTC-3'           |
| Fe-14S            | 5'-CTCAGACACCGGAATTACCCCTGTT-3'         |
| Fe-15S            | 5'-AATACGGTCTGGGAGCCTCAACG-3'           |
| Fe-19S            | 5'-ACTCTCCCGTGTCTGACTGTTAATC-3'         |
| Fe-36S            | 5'-AACCGCTTGGTACARTTCATAAGAG-3'         |
| Fe-37S            | 5'-GTCTCCAGGCTCCCCAGTTGAC-3'            |
| Fe-44S            | 5'-CGGAATTCATCGAGATGGAAGGTCC-3'         |
| Fe-45S            | 5'-ACCAGCCTGTATGCAAATGTAATC-3'          |
| Fe-46S            | 5'-ACCAGCCTGTATGCAAATAAGACTC-3'         |
| Fe-55S            | 5'-CTGAGCCAAAGTGGGACACTTAAC-3'          |
| Fe-56S            | 5'-GAATTGAGCCTGTCTACAGCTCTTC-3'         |
| Fe-57S            | 5'-TTAGAGGAATAAGCTCGGGGTAAC-3'          |
| Fe-58S            | 5'-CATTGAGCTTGCAGTTAAGGGACT-3'          |
| Fe-60S            | 5'-GTACTAACGGTTTTTGGAAACATGC-3'         |
| Fe-61S            | 5'-ATCTAGACACCAGACATGTGAACCA-3'         |
| Fe-63S            | 5'-CGGTACATACAAAATGGACTAGC-3'           |
| Fe-66S            | 5'-CCGAAAAMTTCCTGACTGTTAAGA-3'          |
| Fe-73S            | 5'-AATTTGGACCTCCGGTTACCTTG-3'           |
| Fe-75S            | 5'-GAGTCTAAAATTTGCCTCTGGGTG-3'          |
| Fe-76S            | 5'-CAGTAGCCTAAGGAGATCAAAATGGA-3'        |
| Fe-77S            | 5'-CGTTAGAGCCGGCTTACTTACCGAT-3'         |
| Fe-79S            | 5'-GCCTGTAAGGTCTGTCAACAGGT-3'           |
| Fe-87S            | 5'-CTGTACGTCAGCCCATCCT-3'               |
| Fe-90S            | 5'-ATCCTGTGAGTTGGTGAGAGACC-3'           |
| Fe-94S            | 5'-TCGTGAGACTCCCCAAATCC-3'              |
| Fe-97S            | 5'-CGTGTACCGAATAAACCTCTTGC-3'           |
| Fe-103S           | 5'-GAGCTTGGTTCCCTAACATTTGGTG-3'         |
| Fe-122S           | 5'-TGAAAGGAGGAACCTTTCATGTAGG-3'         |
| Fe-130S           | 5'-CCGAATTCRCACAAACCCAAAATGA-3'         |
| Fe-147S           | 5'-TGAGAGACCCCTGGTCTAGCTT-3'            |
| PRB1              | 5'-CTGTTCACTCCTCGACAACG-3'              |
| MY1F              | 5'-GAGGAGGAGAACTTCTACCAGCA-3'           |
| Hub-b-actin(DNA)s | 5'-ATCATGTTTGAGACCTTCAA-3'              |
| dog-ckit-1S       | 5'-CCCATGTATGAAGTACAGTGGGAAG-3'         |
| Fe-1R             | 5'-GGTACCCGGGGCGGTCAAGTCTCGGCAAAG-3'    |
| Fe-3R             | 5'-CATGGTYGGTCYGGATCGTATTG-3'           |
| Fe-7R             | 5'-GTCAACTGGGGAGCCTGGAGAC-3'            |
| Fe-18R            | 5'-ACAGATCTGCCCGGGTTCGTAGTGGCC-3'       |
| Fe-20R            | 5'-CTCGAAATCTCAAAGAGCAGAATC-3'          |
| Fe-21R            | 5'-AACAGGGTTAATTCGCCGTGTCTGAGTTG-3'     |
| Fe-22R            | 5'-GTCTCTGCATCACCTAAAGGAATGT-3'         |
| Fe-25R            | 5'-TGATCTGTTCTCTGTTGAATGAAG-3'          |
| Fe-26R            | 5'-TTATAAGGGTGGACTCCTCATGAAT-3'         |
| Fe-27R            | 5'-ACATTTAGGTGCAGAGCTCAAATC-3'          |
| Fe-30R            | 5'-CGAAGGAGTTCTAGAAGGGAAGA-3'           |
| Fe-34R            | 5'-TCGAATTCGAAACGGAAAGCGTCTATCAGTAAA-3' |
| Fe-35R            | 5'-CTGAATTCATGATCTCATGGCTCTGGGGTTC-3'   |
| Fe-38R            | 5'-CACACATGCTCTAGACACAATACCC-3'         |
| Fe-42R            | 5'-CCATAGCAGCTGACTAGTTGAATG-3'          |
| Fe-44R            | 5'-TGAGACAGAACATACTGTGACAAA-3'          |
| Fe-50R            | 5'-TTGAATTCATGGTTGGTCTGGATCGTATTG-3'    |
| Fe-53R            | 5'-AGAGGAAATAAACCGGGTAGTGTGT-3'         |
| Fe-54R            | 5'-GGTGTCTATTGTTAGGAGAGAAAA-3'          |
| Fe-55R            | 5'-TGTTAGGAATCCTGTAGCAAAGTGC-3'         |
| Fe-56R            | 5'-CTCTGAGCACACTACTCTCAACTGC-3'         |
| Fe-58R            | 5'-GAGTCTCAGGGAAGTGAAGGACT-3'           |
| Fe-60R            | 5'-GAGTCTTATTGTCATACAGGCTGGT-3'         |
| Fe-62R            | 5'-GGGTTTTGATCAGGCAGGA-3'               |
| Fe-63R            | 5'-CTGACTTTGGCAGGGCTAA-3'               |
| Fe-68R            | 5'-AGCGAATGTACACATTTGGTCTCTC-3'         |
| Fe-69R            | 5'-TAAACAGACTAAGGTGGAGGATTGC-3'         |
| Fe-70R            | 5'-CCACCCAGTCTGTTATTTTCGTAC-3'          |
| Fe-71R            | 5'-ATTTTCTTCTGCTCGCTCCTTG-3'            |
| Fe-73R            | 5'-AATCTGCACCTTCAATTTTCAGATCC-3'        |
| Fe-78R            | 5'-CGGTCCAGGAGTAGATTGCCAAGTCAAGTA-3'    |
| Fe-80R            | 5'-GAATTAACCTGACATCTGGATGAG-3'          |
| Fe-81R            | 5'-AAGAATCTCCAGTGAAGCCGTATG-3'          |
| Fe-82R            | 5'-ATCTGGGCTAAGCTTAAACATTTTC-3'         |
| Fe-95R            | 5'-GGGGGAGAAGGAATTGAGC-3'               |
| Fe-96R            | 5'-TTCCTTTCGGGGAAGGACTA-3'              |
| Fe-102R           | 5'-GGATGAGATCCTCCAGGTG-3'               |
| Fe-126R           | 5'-CAGAATTCCTCATCCCCCATTTTCTTT-3'       |
| MY2R              | 5'-CTGCAGGTACAAGTGGAGGT-3'              |
| Hub-b-actin(DNA)r | 5'-AGATGGGCACAGTGGGT-3'                 |
| dog-ckit-1R       | 5'-GTTCCCTAAAGTCATTGTTACACG-3'          |

Supplementary Table 5. Pol and Env genes used in the phylogenetic analysis

| ID                             | Virus                                          | genus | Accession # of   | Accession # of   |
|--------------------------------|------------------------------------------------|-------|------------------|------------------|
|                                |                                                |       | Pol <sup>a</sup> | Env <sup>a</sup> |
| ALV                            | Avian leukosis virus                           | a     | ABO60875.1       | AAU06813.1       |
| MAV                            | Avian myeloblastosis virus                     | a     | AAA46304.1       | AAA46303.1       |
| HERV-K <sup>b</sup>            | Human endogenous retrovirus K                  | b     | CAA76882.1       | CAA76886.1       |
| JSRV                           | Jaagsiekte sheep retrovirus                    | b     | NP_041186.1      | AAD45228.2       |
| MMTV                           | Mouse mammary tumor virus                      | b     | NP_955564.1      | BAA03768.1       |
| MPMV                           | Mason-Pfizer monkey virus                      | b     | AAA47711.1       | AAA47712.1       |
| SRV-4                          | Simian retrovirus 4                            | b     | ADC33201.1       | ADC52789.1       |
| BaEV_M7 <sup>b</sup>           | Baboon endogenous retrovirus                   | g     | P10272.1         | P10269.1         |
| enFeLV_AGTT <sup>b</sup>       | Endogenous feline leukemia virus               | g     | AY364318.1       | AY364318.1       |
| ERV-DC_ECE1 <sup>b</sup>       | Feline endogenous retrovirus                   | g     | CAB38566.1       | CAB38567.1       |
| ERV-DC18 <sup>b</sup>          | Feline endogenous retrovirus                   | g     | -                | -                |
| F-MuLV                         | Friend murine leukemia virus                   | g     | CAA26560.1       | CAA26561.1       |
| FeLV-A_61E                     | Feline leukemia virus                          | g     | AAA93092.1       | AAA93093.1       |
| FeLV-A_clone33                 | Feline leukemia virus                          | g     | BAL04139.1       | BAB63924.1       |
| GaLV                           | Gibbon ape leukemia virus                      | g     | AAA46810.1       | AAA46811.1       |
| KoRV                           | Koala retrovirus                               | g     | AAF15098.1       | AAF15099.1       |
| M-MuLV                         | Moloney murine leukemia virus                  | g     | AAC82568.1       | AAB59943.1       |
| PERV-C <sup>b,c</sup>          | Porcine endogenous retrovirus                  | g     | ABM65596.1       | ABM65597.1       |
| RD-114_SC3C <sup>b</sup>       | Feline endogenous retrovirus-related virus     | g     | ABS71856.1       | ABS71857.1       |
| REV-A                          | Reticuloendotheliosis virus                    | g     | ABC26818.1       | AAW57301.1       |
| XMRV                           | Xenotropic murine leukemia virus-related virus | g     | ABD49687.1       | ADU55752.1       |
| Mouse ERVs <sup>b,c</sup>      | ERVs found in the <i>M. musculus</i> genome    | g     | -                | -                |
| Rat ERVs <sup>b,c</sup>        | ERVs found in the <i>R. norvegicus</i> genome  | g     | -                | -                |
| Chimpanzee ERVs <sup>b,c</sup> | ERVs found in the <i>P. troglodytes</i> genome | g     | -                | -                |
| Macaque ERVs <sup>b,c</sup>    | ERVs found in the <i>M. mulatta</i> genome     | g     | -                | -                |

<sup>a</sup>A dash (-) indicates that the amino acids sequence was obtained in this study. <sup>b</sup>A virus is of endogenous origin. <sup>c</sup>An ERV was found by RetroTector<sup>®</sup>. <sup>d</sup>A ψ indicates that the ORF was truncated by substitutions and/or indels.
